# Supplementary material
Source: Springer Nature journal article supplement (https://www.springermedizin.de/resource/supplementary/13075_2009_2638_MOESM8_ESM.pdf/9692540)
Supplement: MOESM8 [file 9692540]

Table 1

Echo shifts from cartilage surface and cartilage-bone interface in shrinkage and swelling phase

|                          | Control<br>(n = 10) | Group I<br>(n = 10) | Group II<br>(n = 10) | <i>P</i> value |
|--------------------------|---------------------|---------------------|----------------------|----------------|
| <b>Shrinkage phase</b>   |                     |                     |                      |                |
| Cartilage surface        | -82.6 ± 26.1 ns     | -77.4 ± 22.7 ns     | -70.7 ± 27.8 ns      | NS             |
| Cartilage-bone interface | 5.2 ± 24.8 ns       | 14.2 ± 24.8 ns      | 22.4 ± 16.6 ns       | NS             |
| <b>Swelling phase</b>    |                     |                     |                      |                |
| Cartilage surface        | -9.2 ± 21.5 ns      | -2.6 ± 15.0 ns      | 4.4 ± 9.6 ns         | NS             |
| Cartilage-bone interface | -86.0 ± 18.1 ns     | -74.8 ± 12.9 ns     | -69.1 ± 19.2 ns      | NS             |

Data are mean ± standard deviation. *P* value based on Kruskal-Wallis test. The significance level was set at  $P < 0.05$ . NS, not significant.
